# Supplementary material for: Compared the Microbiota Profiles between Samples from Bronchoalveolar Lavage and Endotracheal Aspirates in Severe Pneumonia: A Real-World Experience
Source: MDPI journal article supplement (doi:10.3390/jcm11020327), 2022-01-10
Supplement: s1 [file s1]

# Supplementary Material

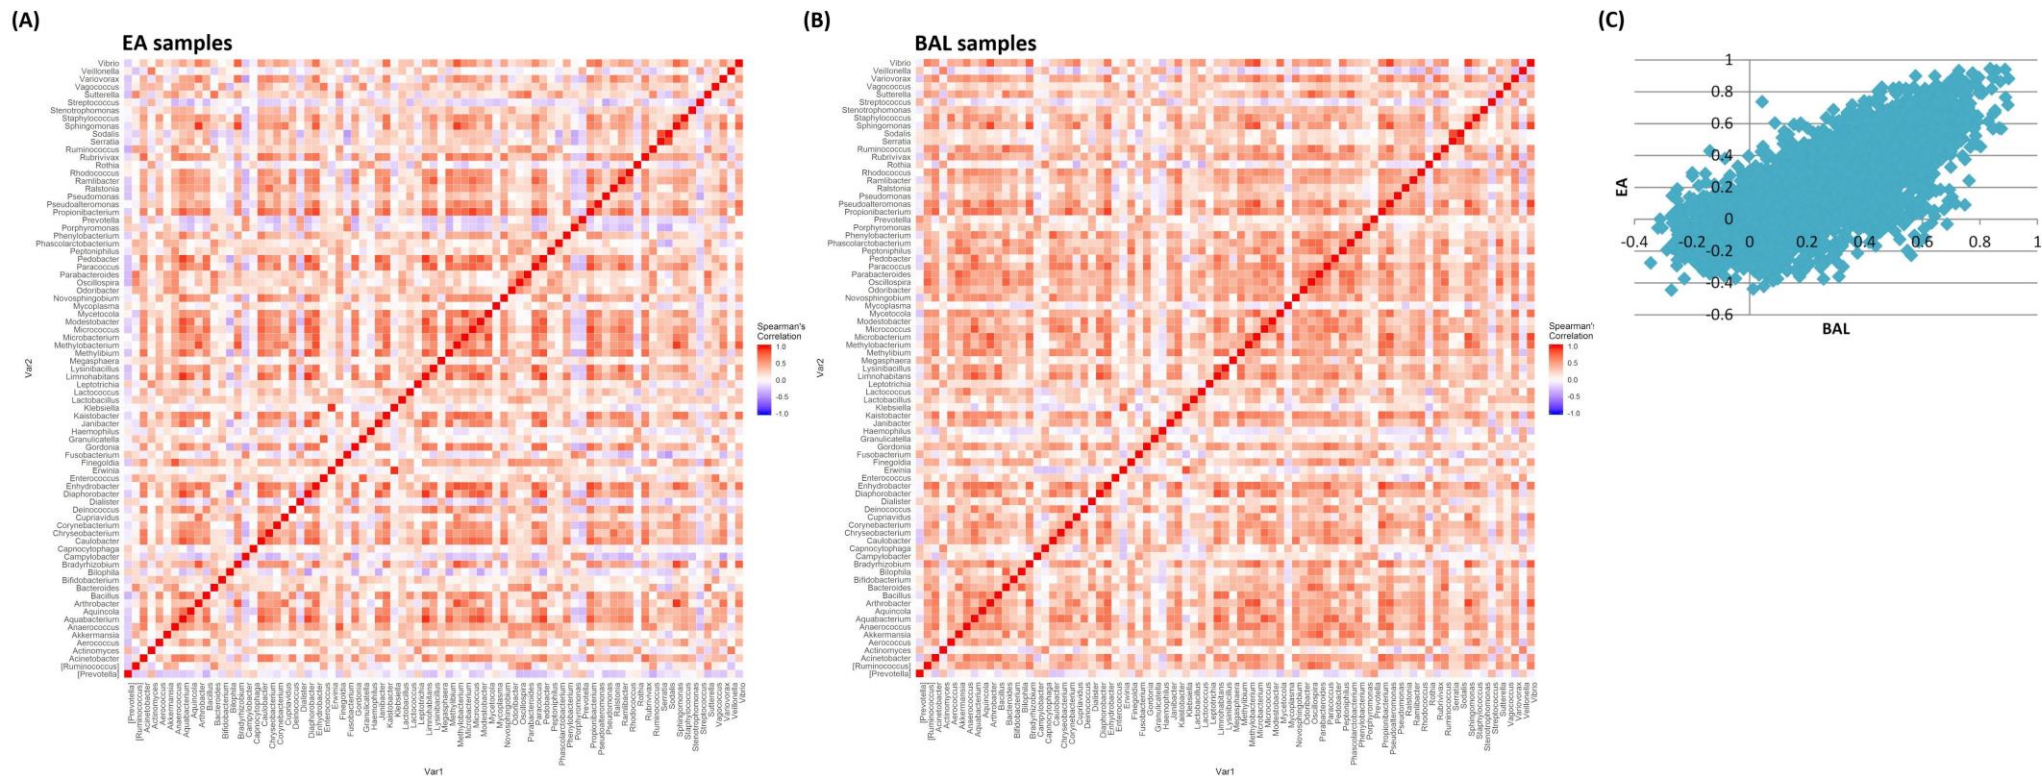

**Figure S1.** (A) The correlation between microbial communities was the same in the EA samples; (B) The correlation between microbial communities was the same in the BAL samples.; (C) Distribution of rho correlations between microbial communities in EA and BAL samples.
